# Supplementary material
Source: Springer Nature journal article supplement (https://www.springermedizin.de/resource/supplementary/12936_2012_2194_MOESM2_ESM.pdf/9542984)

# Legend

- Control Houses
- Intervention Houses

— Roads

— Rivers

□ Luangwa District

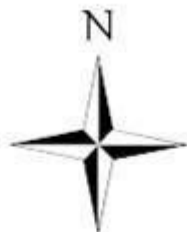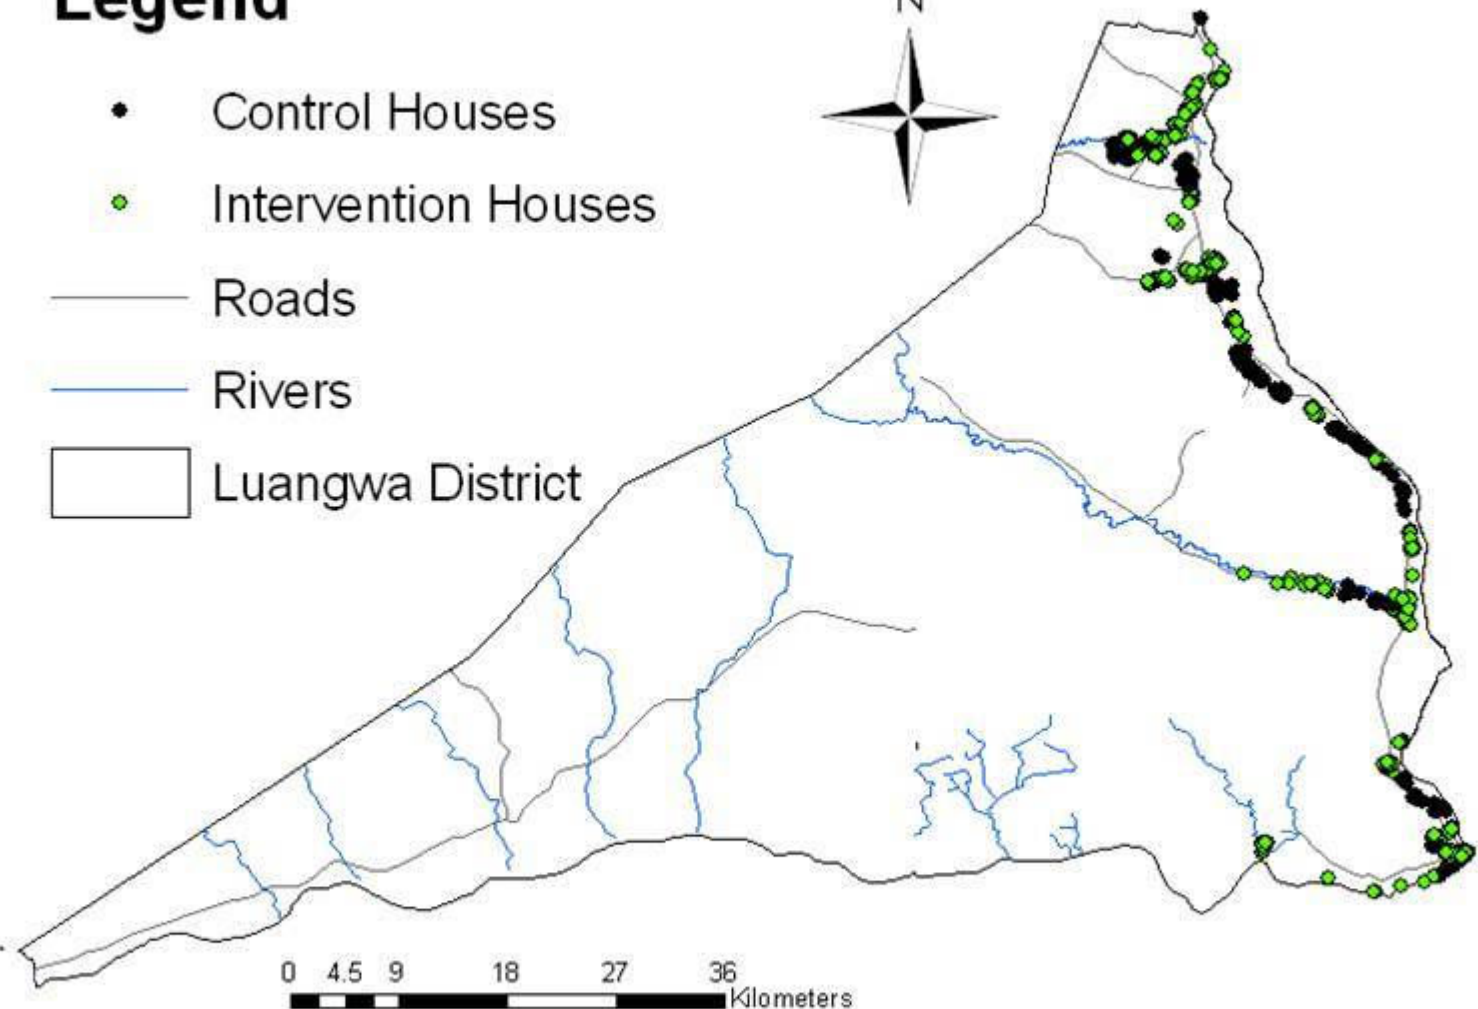

0 4.5 9 18 27 36 Kilometers

Supplement: MOESM2 [file 9542984]
